# Supplementary material for: Identifying long-term periodic cycles and memories of collective emotion in online social media
Source: PubMed Central journal article supplement (PMC6428299; doi:10.1371/journal.pone.0213843), 2019-03-21
Supplement: pone.0213843.s001.pdf [file pone.0213843.s001.pdf]

# SI Appendix:

## Identifying long-term periodic cycles and memories of collective emotion in online social media

Yukie Sano, Hideki Takayasu, Shlomo Havlin and Misako Takayasu

### 1 Dictionary building procedure

The Following procedure were conducted to build our emotion dictionary.

1. Parse one word that best expresses the emotion from each POMS question item using the Japanese morphological analyzer, MeCab<sup>1</sup>
2. Confirm whether the parsed word expresses emotion by three independent people.
3. Add orthographical variants for words with the same pronunciation and meaning, but different spellings using UniDic<sup>2</sup>
4. Exclude very low frequency words. To keep adequate numbers of words in the emotion dictionary, we excluded the words that appeared fewer than five times per month as of October 2015, when no big events occurred
5. Modify very high frequency words that appear more than 1,000 times per day as of October 2015. If a word appears more than 1,000 times, add one or two new words to the original words using original question sentences. If the number is still over 1,000, add a period to the end of the phrase.
6. Adjust 20 to 25 words per emotion. If one emotion has more than 25 words, exclude low frequency words. If it still has fewer than 20 words, add synonyms using Japanese WordNet<sup>3</sup>. Note that there are 35 words for *Confusion* since there are many low frequency words as a whole.
7. Check whether only one word is dominant in each emotion. If one word occupies more than 20% in an emotion, modify the word by procedure 5.

---

<sup>1</sup><http://taku910.github.io/mecab/>: Accessed December 6, 2016

<sup>2</sup><https://ja.osdn.net/projects/unidic/>: Accessed December 6, 2016

<sup>3</sup><http://nlpwww.nict.go.jp/wn-ja/>: Accessed December 6, 2016

8. Choose 20 weblog articles randomly per listed word and have three independent people check whether the words are consistent with each emotion. If more than half the weblog articles are not consistent with the emotion, exclude the words from the dictionary.

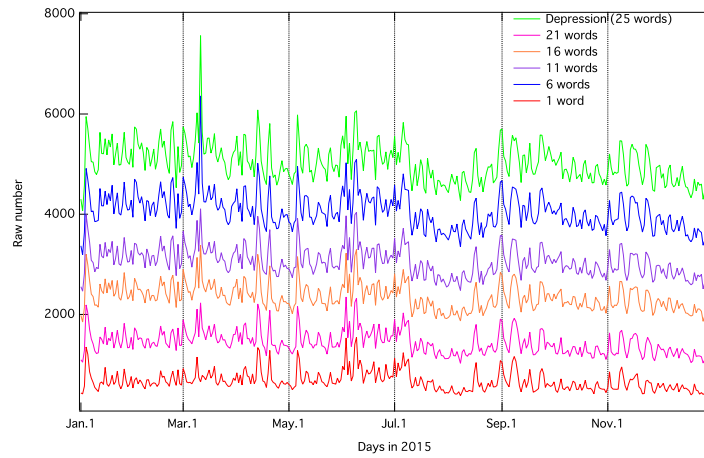

Figure 1: Example of the process of adding words to build an emotional time series for *Depression*. Time series adding five words in the raw number.

## 2 Dates in which emotion decreased every year

Table 1: **Dates in which emotion decreased less than  $90\% \pm 15\%$ .** Rates are calculated from the temporal average for the whole period expect for the 3.11 earthquake.

| Date        | Emotion           | Rate (%) | Event                     |
|-------------|-------------------|----------|---------------------------|
| January 1   | <i>Tension</i>    | 64.2     | New Year's Day            |
|             | <i>Depression</i> | 72.2     |                           |
|             | <i>Anger</i>      | 64.1     |                           |
|             | <i>Vigor</i>      | 89.0     |                           |
|             | <i>Fatigue</i>    | 60.1     |                           |
| January 2   | <i>Tension</i>    | 79.1     | New Year's Day            |
|             | <i>Anger</i>      | 84.1     |                           |
| January 3   | <i>Tension</i>    | 87.3     | New Year's Day            |
| April 1     | <i>Fatigue</i>    | 86.2     | April fool                |
| April 25    | <i>Tension</i>    | 89.8     | Golden Week (GW) holidays |
| April 28    | <i>Tension</i>    | 89.6     |                           |
| April 29    | <i>Tension</i>    | 82.0     |                           |
| April 30    | <i>Tension</i>    | 86.0     |                           |
| May 4       | <i>Tension</i>    | 87.9     |                           |
| May 5       | <i>Tension</i>    | 87.6     |                           |
| October 31  | <i>Fatigue</i>    | 88.9     |                           |
| December 24 | <i>Tension</i>    | 89.6     | Christmas eve             |
|             | <i>Anger</i>      | 87.5     |                           |
|             | <i>Vigor</i>      | 87.7     |                           |
|             | <i>Fatigue</i>    | 85.9     |                           |
|             | <i>Confusion</i>  | 88.4     |                           |
| December 25 | <i>Tension</i>    | 86.0     | Christmas                 |
|             | <i>Vigor</i>      | 87.5     |                           |
|             | <i>Fatigue</i>    | 87.7     |                           |
| December 31 | <i>Tension</i>    | 87.2     | New Year's Eve            |
|             | <i>Fatigue</i>    | 81.5     |                           |

### 3 Emotion dynamics before removing periodic cycles

Here we show autocorrelation functions and  $p$ -values of augmented Dickey-Fuller (ADF) test for emotion dynamics  $Z^k(t)$  before removing periodic cycles . For stationary samples, we use  $p$ -values are less than 0.01 in Table 2.

Table 2:  $p$ -values of ADF test for emotion dynamics  $Z^k(t)$  before removing periodic cycles by year.

|      | <i>Tension</i> | <i>Depression</i> | <i>Anger</i> | <i>Vigor</i> | <i>Fatigue</i> | <i>Confusion</i> |
|------|----------------|-------------------|--------------|--------------|----------------|------------------|
| 2006 | 0.225          | 0.674             | 0.495        | 0.416        | 0.139          | 0.707            |
| 2007 | < .01          | 0.132             | 0.011        | < .01        | 0.213          | 0.081            |
| 2008 | < .01          | 0.663             | 0.023        | 0.383        | 0.114          | 0.942            |
| 2009 | 0.046          | 0.088             | 0.067        | 0.031        | 0.626          | 0.012            |
| 2010 | < .01          | < .01             | 0.031        | 0.129        | 0.233          | < .01            |
| 2011 | < 0.043        | < .01             | 0.043        | 0.626        | 0.375          | < .01            |
| 2012 | < .01          | 0.029             | 0.048        | 0.804        | 0.102          | 0.226            |
| 2013 | < .01          | < .01             | < .01        | 0.030        | 0.296          | < .01            |
| 2014 | < .01          | 0.019             | 0.066        | 0.602        | 0.504          | 0.404            |
| 2015 | < .01          | 0.012             | 0.098        | 0.384        | 0.542          | 0.015            |

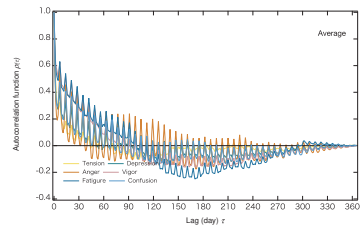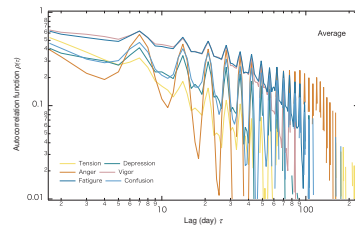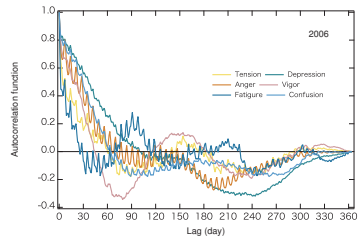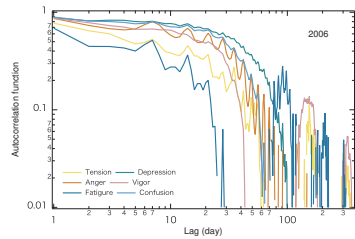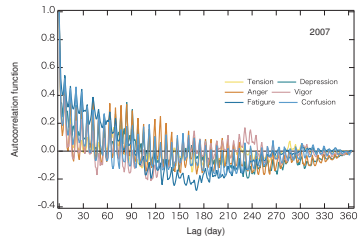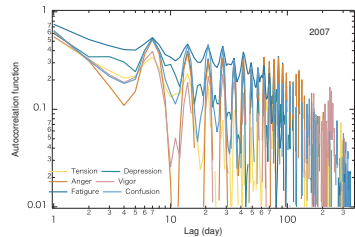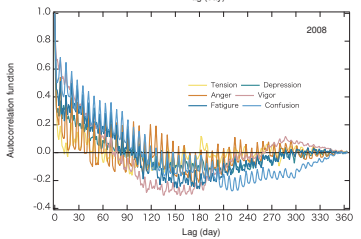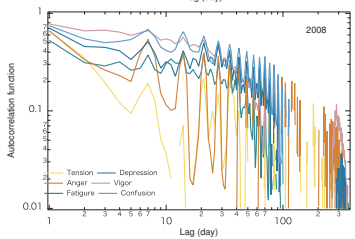

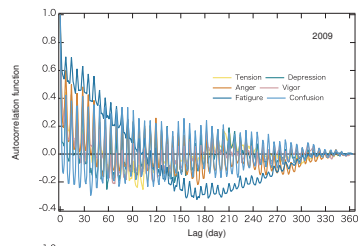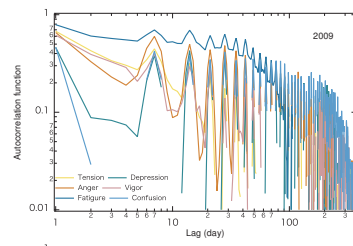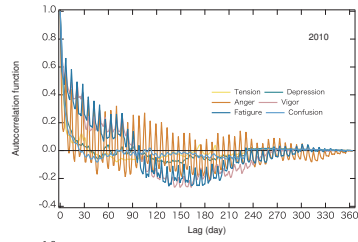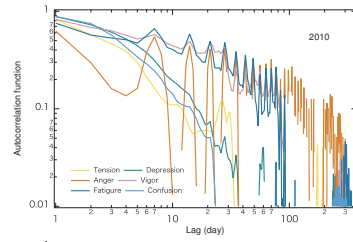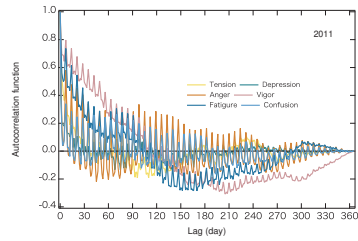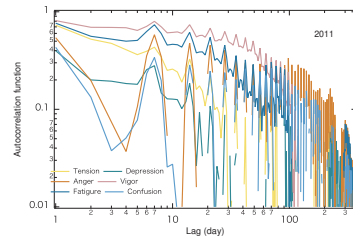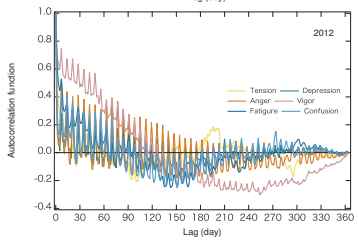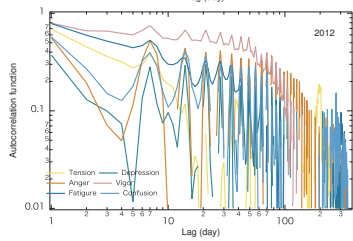

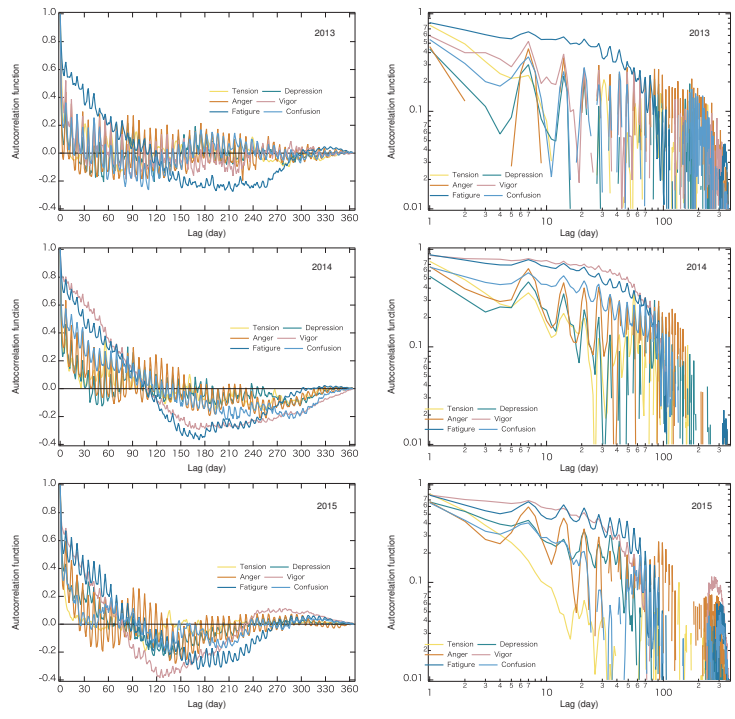

Figure 2: Autocorrelation functions before removing periodic cycles in linear (left) and log-log (right) scale. The averaged autocorrelation function and autocorrelation functions by each year since 2006 are displayed.

## 4 Emotion dynamics after removing periodic cycles

Here we show monthly emotion dynamics  $Z^k(t)$  after removing periodic cycles (Fig. 3). We also show  $p$ -values of ADF test (Table 3) and autocorrelation functions (Fig. 4) for emotion dynamics  $Z^k(t)$  after removing periodic cycles. For stationary samples, we use  $p$ -values are less than 0.01 in Table 3.

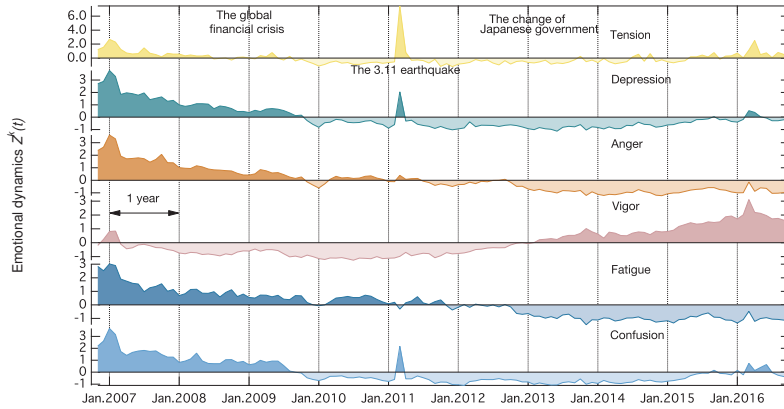

Figure 3: Monthly changes for each emotional dimension after removing all periodic cycles over 10 years. Dashed lines are time series data smoothed by the average of previous six months.

Table 3:  $p$ -values of ADF test for emotion dynamics  $Z^k(t)$  after removing periodic cycles by year.

|      | <i>Tension</i> | <i>Depression</i> | <i>Anger</i> | <i>Vigor</i> | <i>Fatigue</i> | <i>Confusion</i> |
|------|----------------|-------------------|--------------|--------------|----------------|------------------|
| 2006 | < .01          | 0.283             | 0.437        | 0.546        | 0.299          | 0.661            |
| 2007 | < .01          | < .01             | < .01        | < .01        | < .01          | < .01            |
| 2008 | < .01          | < .01             | < .01        | 0.057        | < .01          | 0.151            |
| 2009 | < .01          | < .01             | < .01        | 0.036        | 0.064          | < .01            |
| 2010 | < .01          | < .01             | < .01        | < .01        | < .01          | < .01            |
| 2011 | < .01          | < .01             | < .01        | 0.277        | < .01          | < .01            |
| 2012 | < .01          | < .01             | 0.540        | 0.504        | 0.014          | < .01            |
| 2013 | < .01          | < .01             | < .01        | < .01        | < .01          | < .01            |
| 2014 | < .01          | 0.048             | 0.057        | 0.425        | 0.023          | 0.442            |
| 2015 | < .01          | < .01             | 0.012        | 0.219        | < .01          | < .01            |



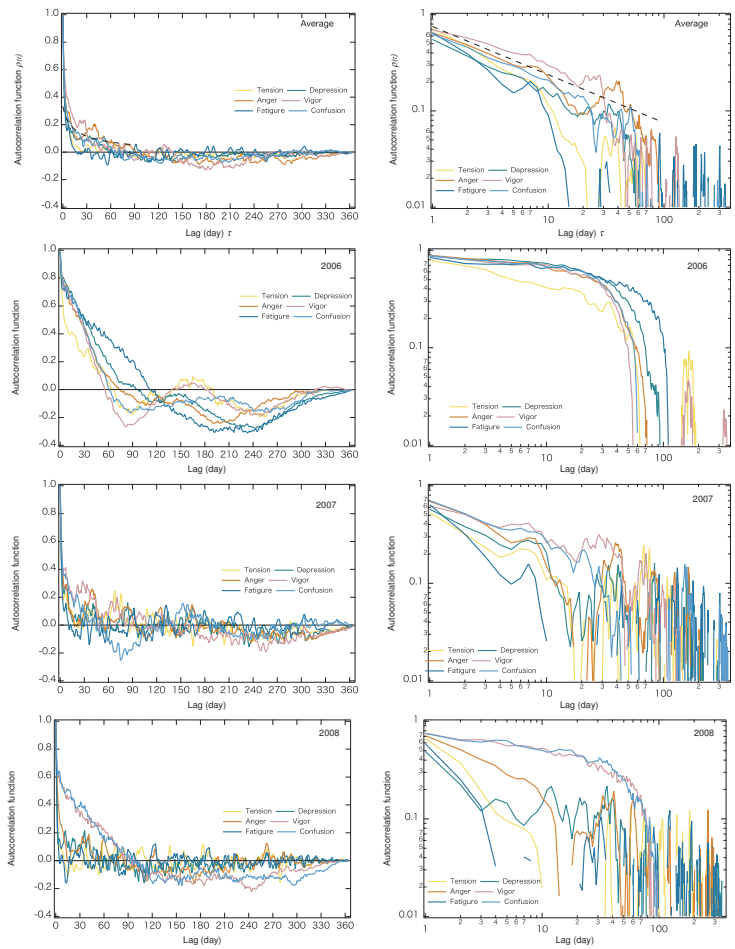

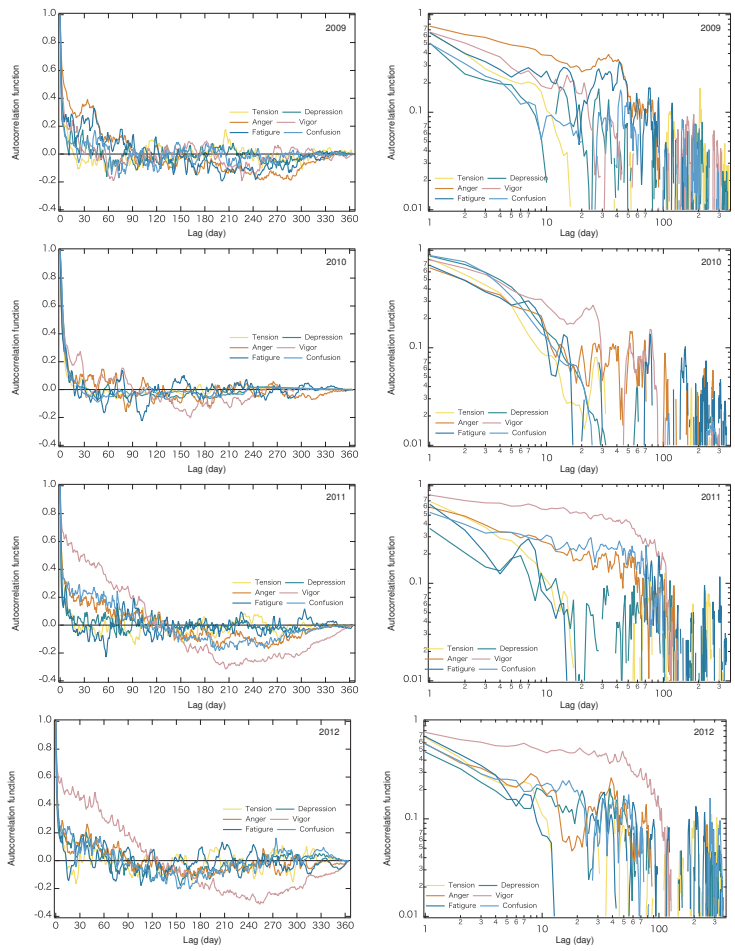

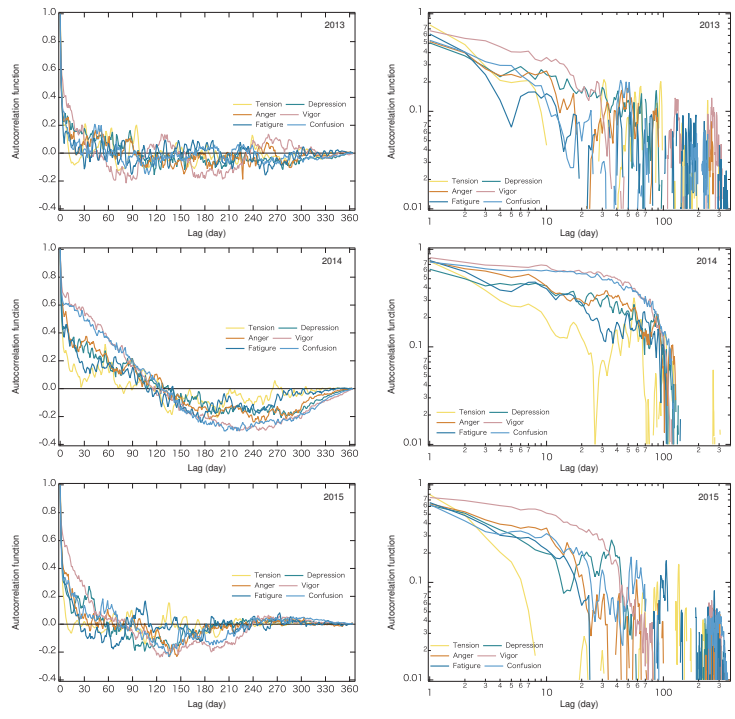

Figure 4: Autocorrelation functions after removing periodic cycles in linear (left) and log-log (right) scale. The averaged autocorrelation function and autocorrelation functions by each year since 2006 are displayed.

## 5 Results of monthly and daily randomized series

We show autocorrelation functions, power spectrum densities (Fig. 5) of randomized series for monthly and daily basis.

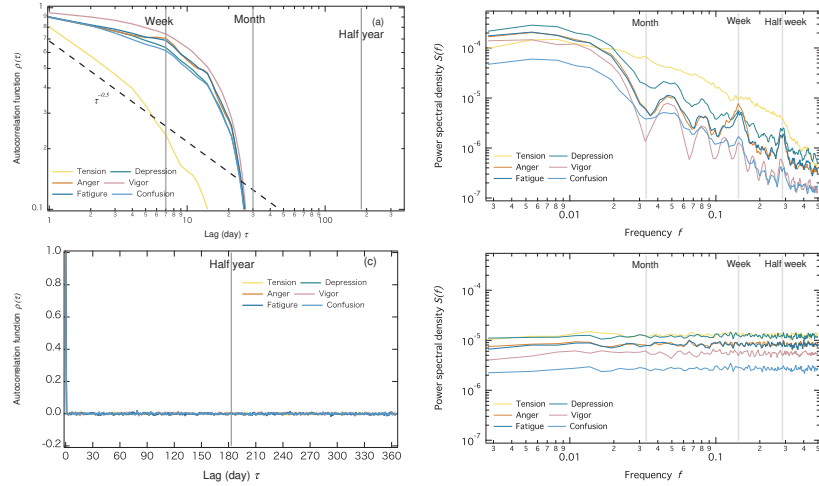

Figure 5: Autocorrelation functions (left) and power spectral densities (right) for randomized series. (a)(b) The results of monthly shuffled series in log-log scale. The results for daily shuffled series in linear (c) and log-log scale (d).

## 6 Histogram of differences of collective emotion

We show the histograms of daily difference of collective emotion dynamics after removing periodic cycles.

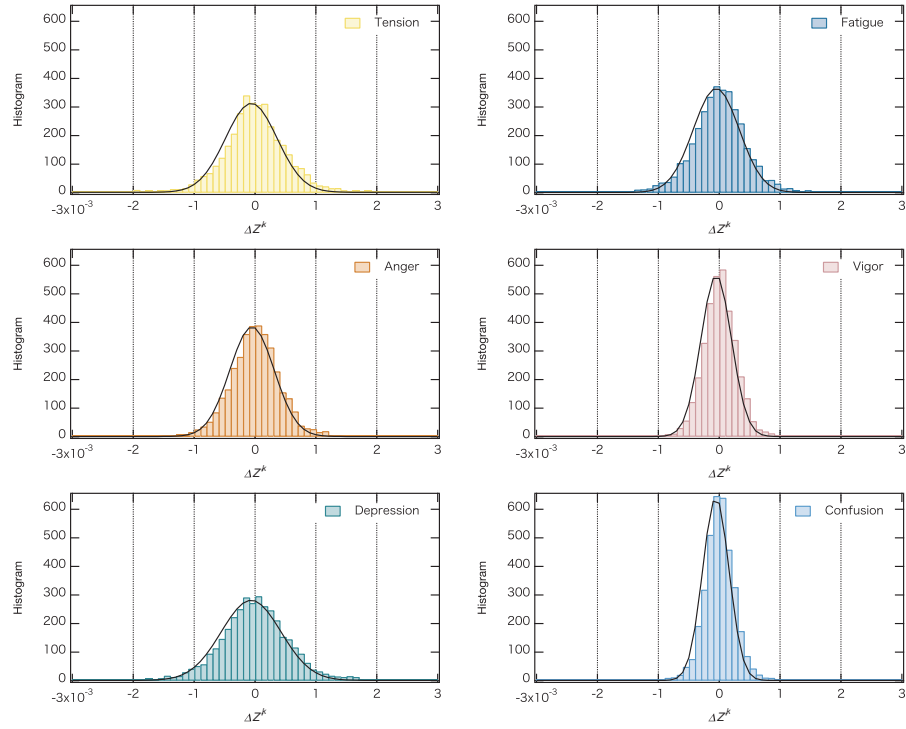

Figure 6: Histograms of daily difference  $\Delta Z^k(t)$  of emotions after removing periodic cycles. Each bin size is  $1.0 \times 10^{-4}$  between  $-3.0 \times 10^{-3}$  to  $3.0 \times 10^{-3}$ . All solid lines indicate normal distributions.
